# Supplementary material for: Lactococcus lactis enhances the flavor of fermented milk by producing 4-hydroxy-2-butanone
Source: Research Square preprint supplement (doi:10.21203/rs.3.rs-8656461/v1), 2026-02-12
Supplement: Supplementary file 1 [file 61e5c70c44b38fde2ce7ea5f.docx]

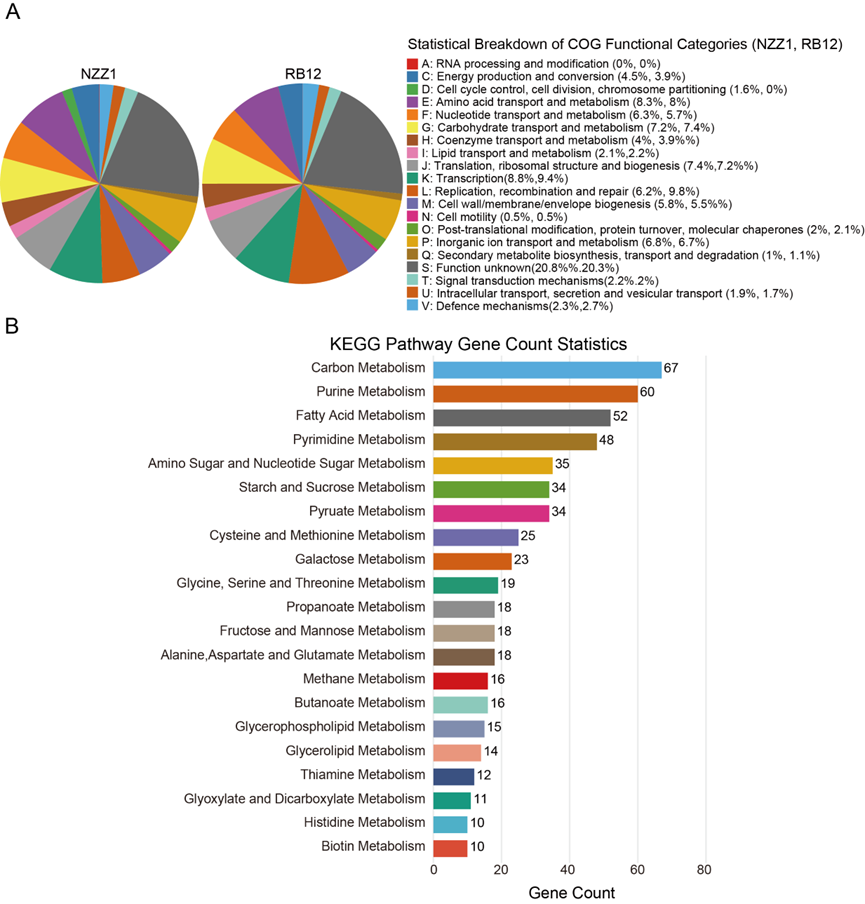


Figure S1: COG (NZZ1 and RB12) and KEGG (NZZ1) annotation results of L. lactis. A Statistical breakdown of COG functional categories (NZZ1 is L. lactis NZZ1, RB12 is L.lactis). B Gene numbers of NZZ1 in the KEGG pathway.


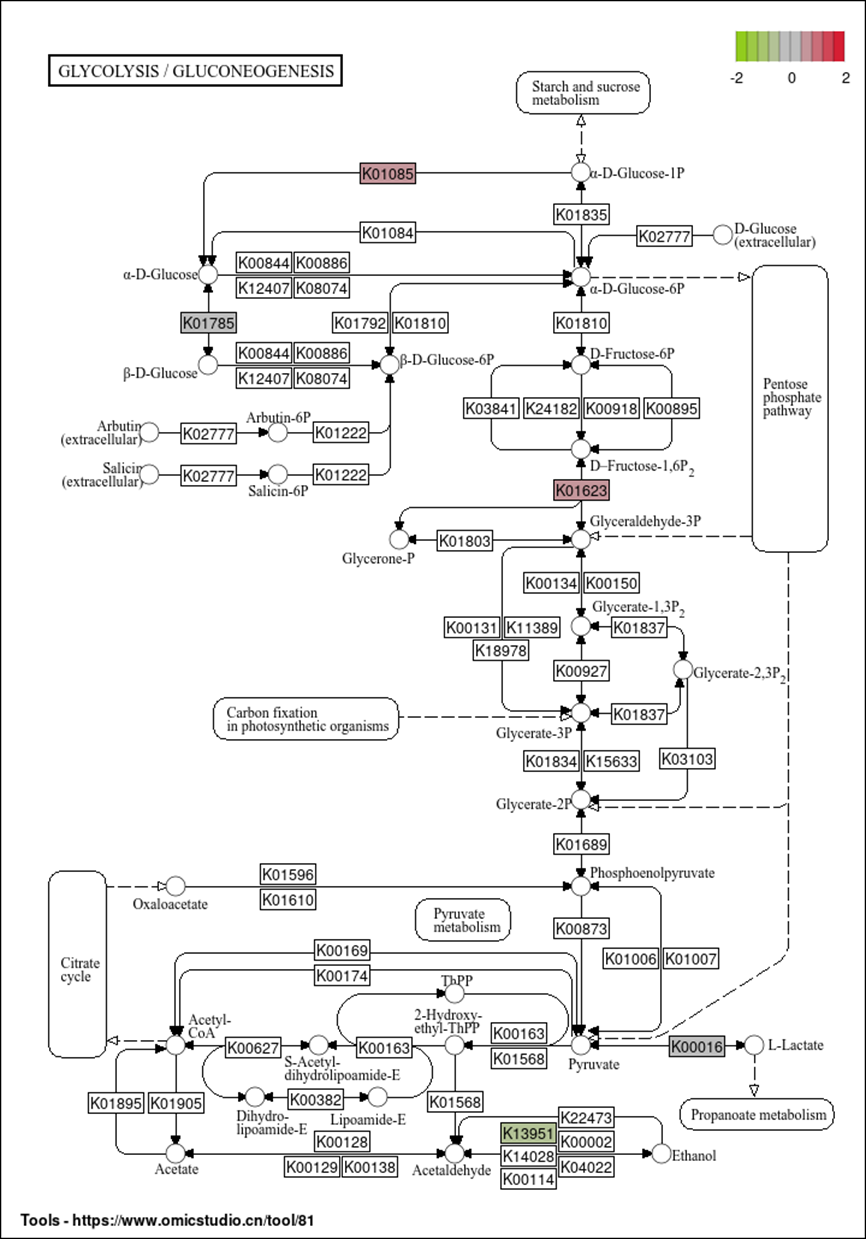


Figure S2: Glycolysis and Gluconeogenesis metabolic pathways. Red represents Strain NZZ1 vs. strain RB12 significantly upregulated and green represents significant downregulation KEGG Orthologys (KOs). Red represents an upward adjustment, green represents a downward adjustment, and the darker the color, the more significant it is.
